# Supplementary material
Source: PubMed Central journal article supplement (PMC2268577)

**A**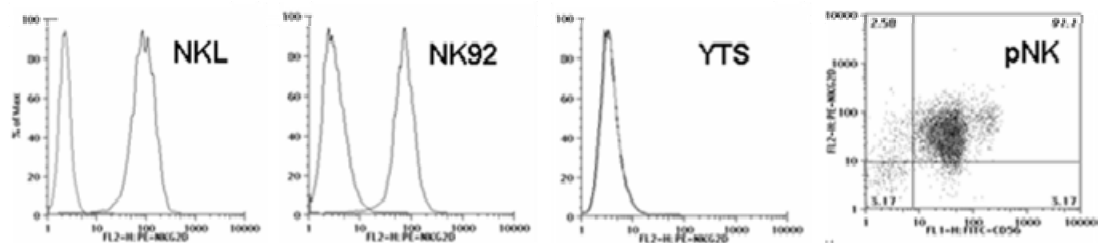**B**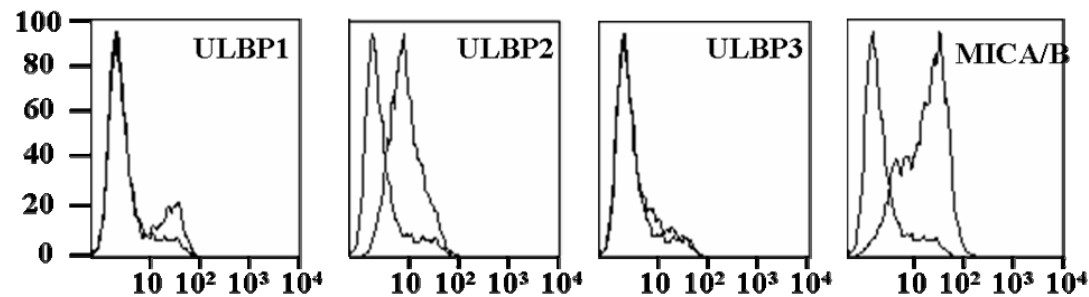**C**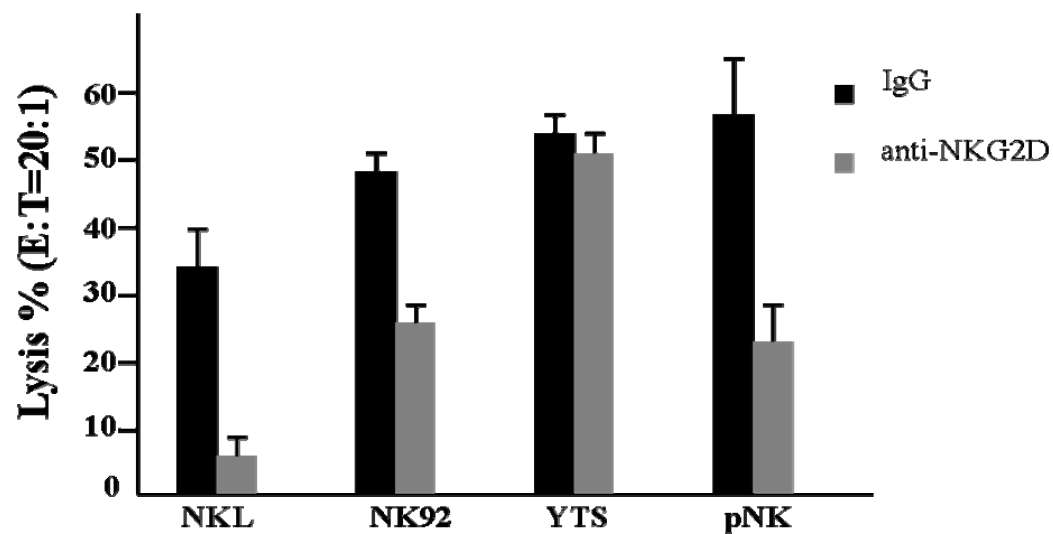

Supplement: pnas_0712310105_1.pdf [file pnas_0712310105_1.pdf]

pNK+K562

C

SP

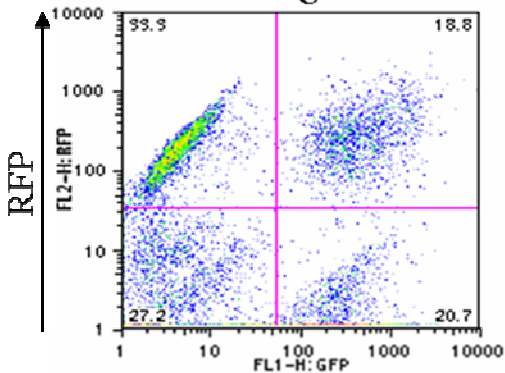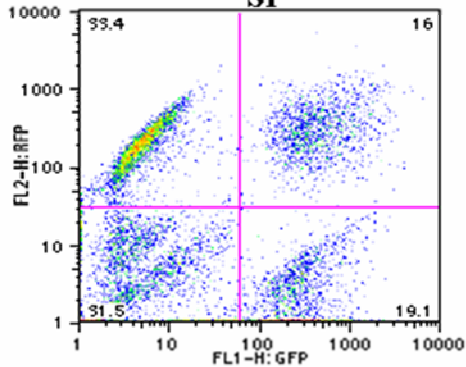

GFP

Supplement: pnas_0712310105_2.pdf [file pnas_0712310105_2.pdf]

**pNK+K562**

**DMSO**

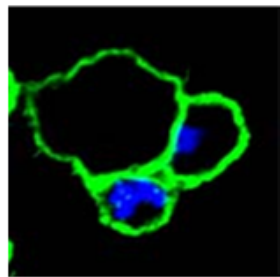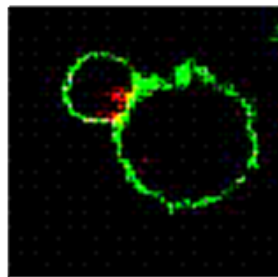

**SP**

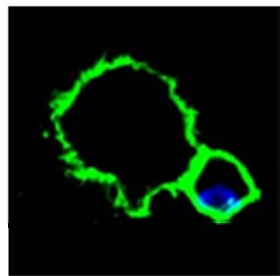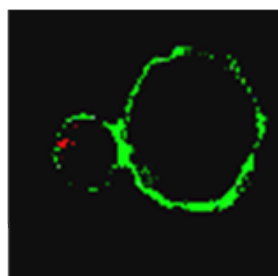

**Granzyme B**

**MTOC**

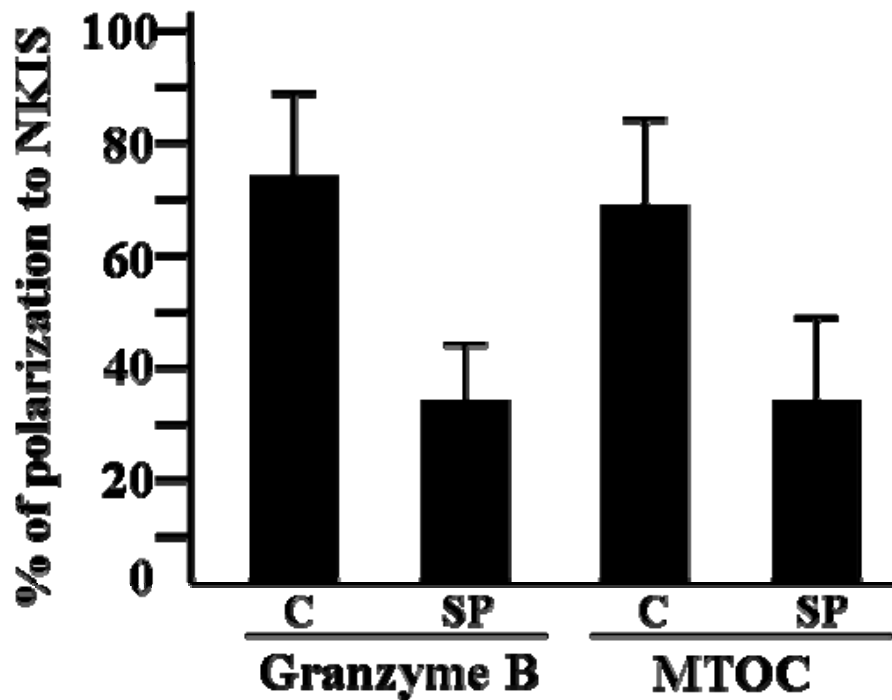

Supplement: pnas_0712310105_3.pdf [file pnas_0712310105_3.pdf]

**B****DIC****F-actin****MT****granules****Merge****JNK siRNA**

K562

NKL

**p38 siRNA**

NKL

K562

**medium**

K562

NKL

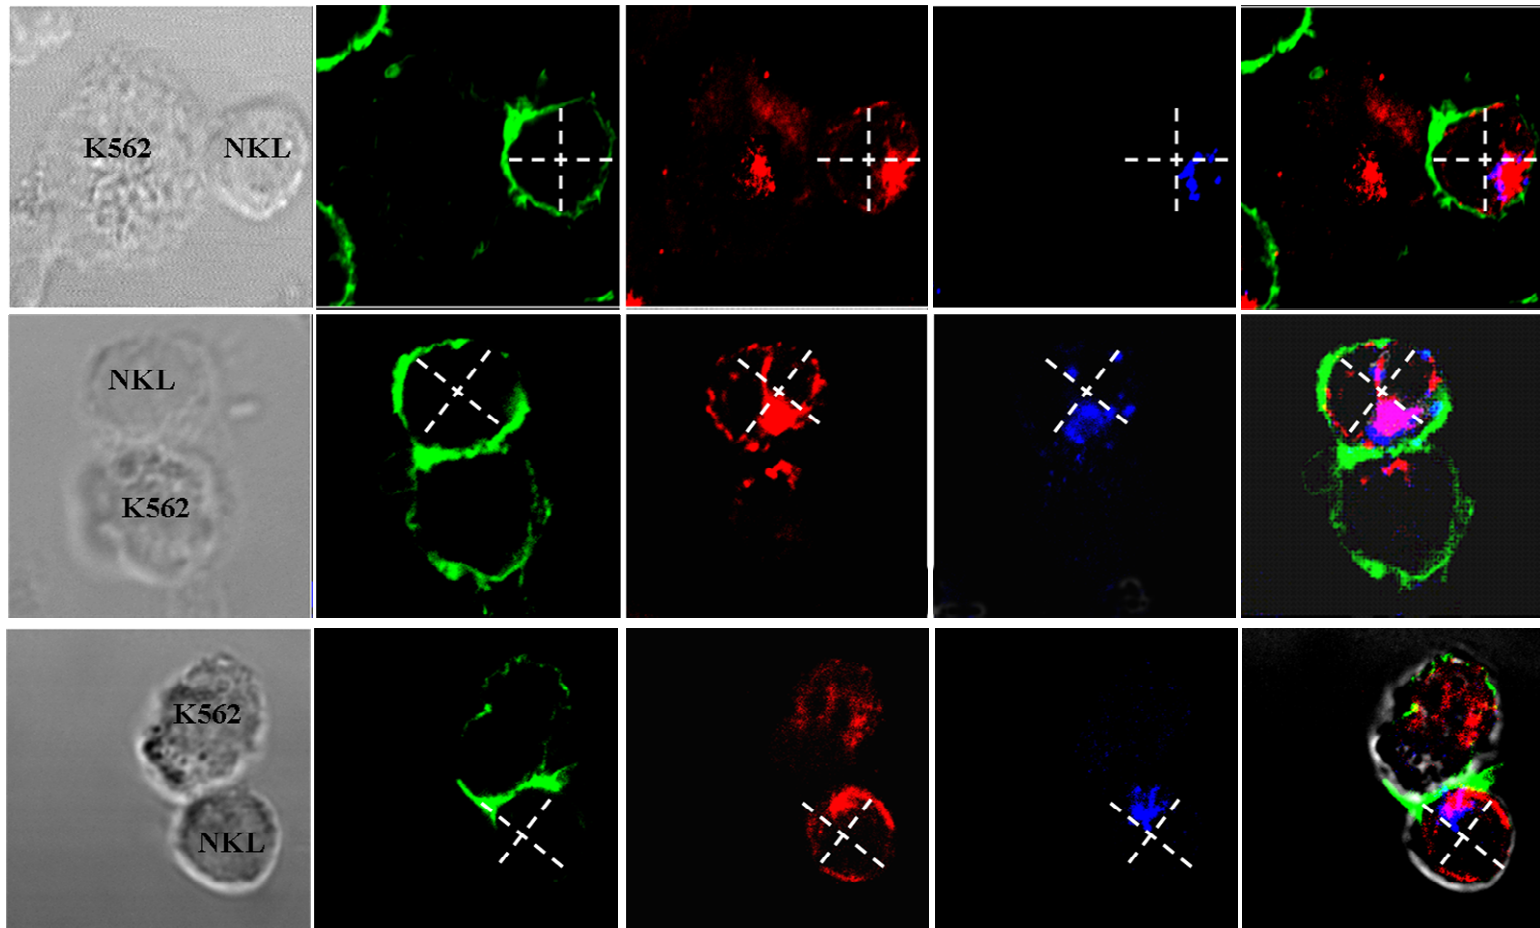

**% of Polarization to NKIS**

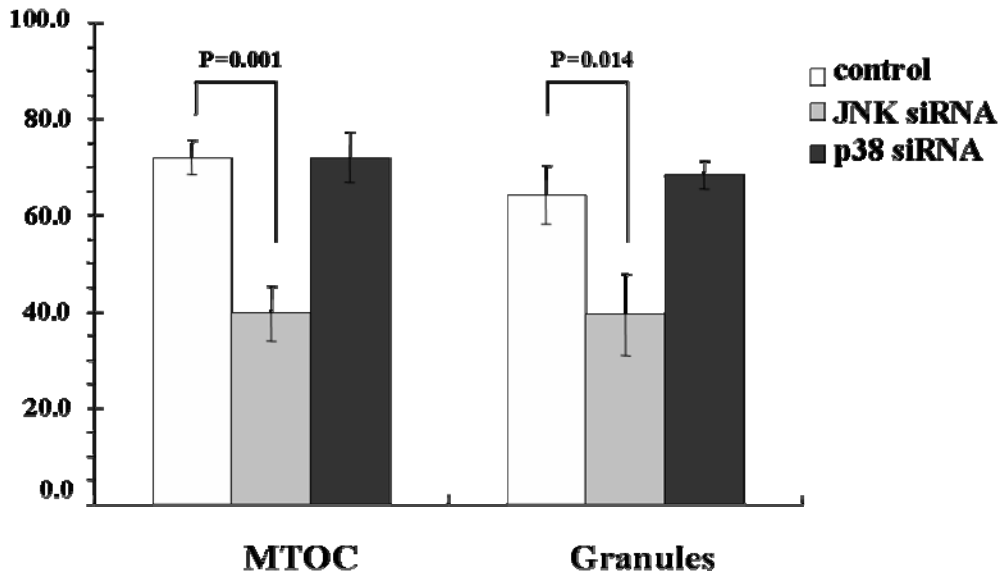

Supplement: pnas_0712310105_4.pdf [file pnas_0712310105_4.pdf]
